# Supplementary material for: Epigenetic Age Acceleration in Mothers and Offspring 4–10 Years after a Pregnancy Complicated by Gestational Diabetes and Obesity
Source: MDPI journal article supplement (doi:10.3390/metabo12121226), 2022-12-07
Supplement: s1 [file s1]

*Analysis: No adjustment for BMI*

**Supplementary Table. 1** Multivariable Linear Regression of the association between biomarkers with DNAm age acceleration residual in Mothers (N=137)

| Variable                      | <u>Horvath Age Acceleration</u> |         | <u>Hannum Age Acceleration</u> |               |
|-------------------------------|---------------------------------|---------|--------------------------------|---------------|
|                               | $\beta$ (SE)                    | P-value | $\beta$ (SE)                   | P-value       |
| HDL (mg/dL)                   | -0.071(0.038)                   | 0.0670  | -0.083(0.036)                  | <b>0.0213</b> |
| Leptin                        | -0.006(0.013)                   | 0.6657  | -0.004(0.013)                  | 0.7807        |
| HOMA-IR                       | 0.101(0.145)                    | 0.4878  | 0.073(0.136)                   | 0.5912        |
| Fasting Glucose (mg/dL)       | -0.002(0.012)                   | 0.8567  | -0.005(0.011)                  | 0.6199        |
| Fasting Insulin ( $\mu$ U/ml) | 0.052(0.051)                    | 0.3077  | -0.386(0.537)                  | 0.4349        |

\* Adjusted for chronological age, plate, and cell-type (CD8T, CD4T, NK, Bcell, Mono, Gran)

**Supplementary Table. 2** Multivariable Linear Regression of the association between biomarkers with DNAm age acceleration residual in Offspring (N=116)

| Variable                      | <u>Horvath Age Acceleration</u> |         | <u>Hannum Age Acceleration</u> |         |
|-------------------------------|---------------------------------|---------|--------------------------------|---------|
|                               | $\beta$ (SE)                    | P-value | $\beta$ (SE)                   | P-value |
| HDL (mg/dL)                   | 0.025(0.058)                    | 0.6624  | 0.021(0.049)                   | 0.6740  |
| Leptin                        | -0.016(0.043)                   | 0.6989  | -0.015(0.036)                  | 0.6801  |
| HOMA-IR                       | 0.3996(0.310)                   | 0.2009  | 0.401(0.261)                   | 0.1274  |
| Fasting Glucose (mg/dL)       | 0.085(0.086)                    | 0.3207  | 0.054(0.072)                   | 0.4551  |
| Fasting Insulin ( $\mu$ U/ml) | 0.109(0.076)                    | 0.1550  | 0.106(0.064)                   | 0.0997  |

\* Adjusted for chronological age, sex, plate, and cell-type (CD8T, CD4T, NK, Bcell, Mono, Gran)

Analysis: No adjustment for Cell Types

**Supplementary Table. 3** Multivariable Linear Regression of the association between metabolites with DNAm age acceleration residual in Mothers (N=137)

| Variable                      | <u>Horvath Age Acceleration</u> |         | <u>Hannum Age Acceleration</u> |         |
|-------------------------------|---------------------------------|---------|--------------------------------|---------|
|                               | $\beta$ (SE)                    | P-value | $\beta$ (SE)                   | P-value |
| HDL (mg/dL)                   | -0.043(0.049)                   | 0.3725  | -0.084(0.048)                  | 0.0843  |
| Leptin                        | -0.027(0.025)                   | 0.2968  | -0.014(0.025)                  | 0.5781  |
| HOMA-IR                       | -0.013(0.198)                   | 0.9480  | -0.047(0.198)                  | 0.8139  |
| Fasting Glucose (mg/dL)       | 0.003(0.015)                    | 0.8403  | -0.007(0.015)                  | 0.6520  |
| Fasting Insulin ( $\mu$ U/ml) | -0.002(0.0687)                  | 0.9780  | -0.001(0.069)                  | 0.9849  |

\* Adjusted for chronological age, current BMI, and plate

**Supplementary Table. 4** Multivariable Linear Regression of the association between metabolites with DNAm age acceleration residuals in Offspring (N=116)

| Variable                      | <u>Horvath Age Acceleration</u> |         | <u>Hannum Age Acceleration</u> |               |
|-------------------------------|---------------------------------|---------|--------------------------------|---------------|
|                               | $\beta$ (SE)                    | P-value | $\beta$ (SE)                   | P-value       |
| HDL (mg/dL)                   | 0.043(0.066)                    | 0.5132  | 0.005(0.064)                   | 0.9356        |
| Leptin                        | -0.056(0.061)                   | 0.3646  | -0.017(0.05965)                | 0.7796        |
| HOMA-IR                       | 0.575(0.367)                    | 0.1195  | 0.678(0.353)                   | 0.0576        |
| Fasting Glucose (mg/dL)       | 0.029(0.096)                    | 0.7615  | -0.008(0.093)                  | 0.9315        |
| Fasting Insulin ( $\mu$ U/ml) | 0.152(0.090)                    | 0.0943  | 0.175(0.087)                   | <b>0.0465</b> |

\* Adjusted for chronological age, sex, BMI z-score, and plate

*Analysis: Adjusted for GDM status*

**Supplementary Table. 5** Multivariable Linear Regression of the association between metabolites with DNAm age acceleration residual in Mothers (N=137)

| Variable                      | <u>Horvath Age Acceleration</u> |         | <u>Hannum Age Acceleration</u> |         |
|-------------------------------|---------------------------------|---------|--------------------------------|---------|
|                               | $\beta$ (SE)                    | P-value | $\beta$ (SE)                   | P-value |
| HDL (mg/dL)                   | -0.063(0.044)                   | 0.1507  | -0.078(0.041)                  | 0.0565  |
| Leptin                        | -0.0257(0.022)                  | 0.2429  | -0.018(0.021)                  | 0.3739  |
| HOMA-IR                       | 0.057(0.166)                    | 0.7303  | 0.022(0.156)                   | 0.8882  |
| Fasting Glucose (mg/dL)       | -0.005(0.013)                   | 0.7076  | -0.008(0.012)                  | 0.4765  |
| Fasting Insulin ( $\mu$ U/ml) | 0.038(0.059)                    | 0.5172  | 0.019(0.055)                   | 0.7370  |

\* Adjusted for chronological age, current BMI, GDM Status, and plate

**Supplementary Table. 6** Multivariable Linear Regression of the association between metabolites with DNAm age acceleration residuals in Offspring (N=116)

| Variable                      | <u>Horvath Age Acceleration</u> |         | <u>Hannum Age Acceleration</u> |               |
|-------------------------------|---------------------------------|---------|--------------------------------|---------------|
|                               | $\beta$ (SE)                    | P-value | $\beta$ (SE)                   | P-value       |
| HDL (mg/dL)                   | 0.028(0.061)                    | 0.6444  | 0.015(0.052)                   | 0.7680        |
| Leptin                        | -0.041(0.059)                   | 0.4849  | -0.012(0.049)                  | 0.8054        |
| HOMA-IR                       | 0.461(0.343)                    | 0.1817  | 0.533(0.287)                   | 0.0657        |
| Fasting Glucose (mg/dL)       | 0.086(0.088)                    | 0.3297  | 0.062(0.074)                   | 0.4052        |
| Fasting Insulin ( $\mu$ U/ml) | 0.128(0.0845)                   | 0.1342  | 0.143(0.071)                   | <b>0.0459</b> |

\* Adjusted for chronological age, sex, BMI z-score, GDM Status, and plate
